# Supplementary material for: Circulating Exosomal SOCS2‐AS1 Acts as a Novel Biomarker in Predicting the Diagnosis of Coronary Artery Disease
Source: Hindawi journal article supplement (doi:10.1155/2020/9182091), 2020-01-01
Supplement: f1 [file 9182091.f1.pdf]

Supplemental Table 1. Clinical characteristics of CAD patients and controls.

| Characteristics                | Patient | Patient | Patient | Control | Control | Control |
|--------------------------------|---------|---------|---------|---------|---------|---------|
|                                | 1       | 2       | 3       | 1       | 2       | 3       |
| Age(years)                     | 63      | 77      | 44      | 67      | 63      | 59      |
| Gender                         | Female  | Male    | Male    | Male    | Male    | Female  |
| Smoking                        | No      | No      | Yes     | Yes     | No      | No      |
| Hypertension                   | Yes     | Yes     | No      | No      | Yes     | No      |
| Diabetes                       | Yes     | Yes     | No      | No      | Yes     | No      |
| Lesion Artery<br>Number        | Multi   | Single  | Multi   | No      | No      | No      |
| Severity of Artery<br>Stenosis | Severe  | Slight  | Severe  | No      | No      | No      |

Severe:  $\geq 75\%$  luminal stenosis of any coronary vessel; Slight:  $50\% \leq$  luminal stenosis of any coronary vessel  $< 75\%$ .

Supplemental Table 2. Clinical characteristics of CAD patients and controls.

| Characteristics   | Control(n=41)      | CAD(n=84)          | P value                |
|-------------------|--------------------|--------------------|------------------------|
| Age(years)        |                    |                    | 0.001 <sup>&amp;</sup> |
| $\leq 60$         | 22                 | 19                 |                        |
| $> 60$            | 19                 | 65                 |                        |
| Gender            |                    |                    | 0.125                  |
| Male              | 21                 | 55                 |                        |
| Female            | 20                 | 29                 |                        |
| Smoking           |                    |                    | 0.034*                 |
| Yes               | 2                  | 16                 |                        |
| No                | 39                 | 68                 |                        |
| Hypertension      |                    |                    | 0.071                  |
| Yes               | 21                 | 57                 |                        |
| No                | 20                 | 27                 |                        |
| Diabetes          |                    |                    | 0.856                  |
| Yes               | 13                 | 28                 |                        |
| No                | 28                 | 56                 |                        |
| CRP(mg/L)         | 3.93 $\pm$ 12.43   | 12.84 $\pm$ 25.65  | 0.010*                 |
| PLT( $10^9$ /L)   | 166.20 $\pm$ 46.05 | 171.67 $\pm$ 52.81 | 0.572                  |
| FIB(g/L)          | 2.18 $\pm$ 0.51    | 2.58 $\pm$ 0.91    | 0.002 <sup>&amp;</sup> |
| INR               | 1.02 $\pm$ 0.07    | 1.05 $\pm$ 0.08    | 0.015*                 |
| BUN (mmol/L)      | 4.99 $\pm$ 1.59    | 6.10 $\pm$ 2.29    | 0.007 <sup>&amp;</sup> |
| Cr ( $\mu$ mol/L) | 71.26 $\pm$ 20.80  | 92.05 $\pm$ 91.50  | 0.154                  |
| FBG (mmol/L)      | 6.56 $\pm$ 2.92    | 6.77 $\pm$ 2.77    | 0.692                  |
| UA ( $\mu$ mol/L) | 310.51 $\pm$ 87.15 | 348.54 $\pm$ 81.45 | 0.018*                 |
| TC (mmol/L)       | 4.03 $\pm$ 0.95    | 4.27 $\pm$ 1.04    | 0.228                  |
| TG (mmol/L)       | 1.68 $\pm$ 0.84    | 2.05 $\pm$ 1.97    | 0.255                  |
| HDL-C (mmol/L)    | 1.38 $\pm$ 0.26    | 1.27 $\pm$ 0.29    | 0.033*                 |

|                |               |               |       |
|----------------|---------------|---------------|-------|
| LDL-C (mmol/L) | 2.05±0.66     | 2.25±0.74     | 0.135 |
| Lpa(mg/L)      | 240.08±215.54 | 244.73±242.96 | 0.917 |

CAD, Coronary Artery Disease; CRP, C-reaction protein; PLT, Platelet; FIB, Fibrinogen; INR, International Normalized Ratio; BUN, Blood Urea Nitrogen; Cr, Creatinine; FBG, Fasting Blood Glucose; UA, Uric Acid; TC, Total Cholesterol; TG, Triglyceride; HDL-C, High Density Lipoprotein-cholesterol; LDL-C, Low Density Lipoprotein-cholesterol; Lpa, Lipoprotein a.

\*  $P < 0.05$ , &  $P < 0.01$ .

Supplemental Table 3. Stratification analyses of plasma exosome-encapsulated SOCS2-AS1 level with the risk of CAD.

|                | Subgroup  |         | OR    | 95%CI        | P value |
|----------------|-----------|---------|-------|--------------|---------|
| Age (years)    | ≤60       | (n=41)  | 0.327 | 0.111-0.961  | 0.042*  |
|                | >60       | (n=84)  | 0.348 | 0.146-0.828  | 0.017*  |
| Gender         | Male      | (n=76)  | 0.334 | 0.148-0.753  | 0.008&  |
|                | Female    | (n=49)  | 0.279 | 0.089-0.873  | 0.028*  |
| CRP (mg/L)     | ≤10       | (n=105) | 0.322 | 0.165-0.629  | 0.001&  |
|                | >10       | (n=20)  | 0.167 | 0.001-24.592 | 0.482   |
| FIB(g/L)       | <2.0      | (n=35)  | 0.248 | 0.063-0.982  | 0.047*  |
|                | 2.0-4.0   | (n=82)  | 0.382 | 0.185-0.787  | 0.009&  |
|                | >4.0      | (n=8)   | Null  | Null         | Null    |
| INR            | <0.8      | (n=0)   | Null  | Null         | Null    |
|                | 0.8-1.2   | (n=121) | 0.339 | 0.179-0.642  | 0.001&  |
|                | >1.2      | (n=4)   | Null  | Null         | Null    |
| BUN(mmol/L)    | <3.1      | (n=9)   | Null  | Null         | Null    |
|                | 3.1-8     | (n=102) | 0.338 | 0.174-0.660  | 0.001&  |
|                | >8        | (n=14)  | Null  | Null         | Null    |
| UA(μmol/L)     | <214      | (n=6)   | Null  | Null         | Null    |
|                | 214-688   | (n=113) | 0.353 | 0.181-0.688  | 0.002&  |
|                | >688      | (n=6)   | Null  | Null         | Null    |
| HDL-C (mmol/L) | <1.04     | (n=24)  | 0.168 | 0.022-1.278  | 0.085   |
|                | 1.04-1.40 | (n=56)  | 0.271 | 0.083-0.883  | 0.030*  |
|                | >1.40     | (n=45)  | 0.421 | 0.185-0.958  | 0.039*  |

OR, odds ratio; CI, confidence interval. CRP, C-reaction protein; FIB, Fibrinogen;

INR, International Normalized Ratio; BUN, Blood Urea Nitrogen; UA, Uric Acid; HDL-C, High Density Lipoprotein- cholesterol. Null, sample size is too small to analyze.

\*  $P < 0.05$ , &  $P < 0.01$ .

Supplemental Table 4. Clinical characteristics of mCAS patients and controls.

| Characteristics   | Control(n=41) | mCAS (n=48)   | P value |
|-------------------|---------------|---------------|---------|
| Age(years)        |               |               | 0.011*  |
| ≤60               | 22            | 13            |         |
| >60               | 19            | 35            |         |
| Gender            |               |               | 0.271   |
| Male              | 21            | 19            |         |
| Female            | 20            | 29            |         |
| Smoking           |               |               | 0.210   |
| Yes               | 2             | 6             |         |
| No                | 39            | 42            |         |
| Hypertension      |               |               | 0.501   |
| Yes               | 21            | 28            |         |
| No                | 20            | 20            |         |
| Diabetes          |               |               | 0.483   |
| Yes               | 13            | 12            |         |
| No                | 28            | 36            |         |
| CRP(mg/L)         | 3.93±12.43    | 3.80±9.67     | 0.955   |
| PLT( $10^9$ /L)   | 166.20±46.05  | 160.40±51.23  | 0.579   |
| FIB(g/L)          | 2.18±0.51     | 2.20±0.48     | 0.829   |
| INR               | 1.02±0.07     | 1.05±0.09     | 0.040*  |
| BUN (mmol/L)      | 4.99±1.59     | 5.74±1.79     | 0.043*  |
| Cr ( $\mu$ mol/L) | 71.26±20.80   | 67.81±13.23   | 0.363   |
| FBG (mmol/L)      | 6.56±2.92     | 6.22±1.91     | 0.513   |
| UA ( $\mu$ mol/L) | 310.51±87.15  | 316.98±88.07  | 0.729   |
| TC (mmol/L)       | 4.03±0.95     | 4.21±0.94     | 0.390   |
| TG (mmol/L)       | 1.68±0.84     | 1.80±0.95     | 0.541   |
| HDL-C (mmol/L)    | 1.38±0.26     | 1.45±0.47     | 0.428   |
| LDL-C (mmol/L)    | 2.05±0.66     | 2.10±0.63     | 0.702   |
| Lpa(mg/L)         | 240.08±15.54  | 217.91±207.66 | 0.623   |

mCAS, mild coronary artery stenosis; CAD, Coronary Artery Disease; CRP, C-reaction protein; PLT, Platelet; FIB, Fibrinogen; INR, International Normalized Ratio; BUN, Blood Urea Nitrogen; Cr, Creatinine; FBG, Fasting Blood Glucose; UA, Uric Acid; TC, Total Cholesterol; TG, Triglyceride; HDL-C, High Density Lipoprotein-cholesterol; LDL-C, Low Density Lipoprotein-cholesterol; Lpa, Lipoprotein a.

\*  $P < 0.05$ , &  $P < 0.01$ .

Supplemental Table 5.

Univariate analysis and multiple logistic regression analysis for the risk of **mCAS**.

| <b>Models</b>                                   | <b>OR</b> | <b>95%CI</b> | <b>P value</b>         |
|-------------------------------------------------|-----------|--------------|------------------------|
| Univariate analysis                             | 0.438     | 0.253-0.758  | 0.003 <sup>&amp;</sup> |
| Multiple logistic regression model <sup>1</sup> | 0.494     | 0.275-0.886  | 0.018*                 |
| Multiple logistic regression model <sup>2</sup> | 0.491     | 0.274-0.881  | 0.017*                 |
| Multiple logistic regression model <sup>3</sup> | 0.499     | 0.274-0.908  | 0.023*                 |
| Multiple logistic regression model <sup>4</sup> | 0.439     | 0.223-0.864  | 0.017*                 |
| Multiple logistic regression model <sup>5</sup> | 0.462     | 0.223-0.957  | 0.038*                 |
| Multiple logistic regression model <sup>6</sup> | 0.170     | 0.056-0.518  | 0.002 <sup>&amp;</sup> |

OR, odds ratio; CI, confidence interval.

The model<sup>1</sup> included age, gender, smoking, and SOCS2-AS1 level; The model<sup>2</sup> included age, gender, smoking, hypertension, and SOCS2-AS1 level; The model<sup>3</sup> included age, gender, smoking, hypertension, diabetes, FBG, and SOCS2-AS1 level; The model<sup>4</sup> included age, gender, smoking, hypertension, diabetes, FBG, BUN, Cr, UA, and SOCS2-AS1 level; The model<sup>5</sup> included age, gender, smoking, hypertension, diabetes, FBG, BUN, Cr, UA, CRP, PLT, FIB, INR and SOCS2-AS1 level; The model<sup>6</sup> included age, gender, smoking, hypertension, diabetes, FBG, BUN, Cr, UA, CRP, PLT, FIB, INR, TC, TG, HDL-C, LDL-C, Lpa, and SOCS2AS1 level.

\*  $P < 0.05$ , &  $P < 0.01$ .
